# Supplementary material for: Electrospinning of Cyclodextrin–Oligolactide Derivatives
Source: MDPI journal article supplement (doi:10.3390/biom13020203), 2023-01-19
Supplement: s1 [file s1]

## Supporting information

### Electrospinning of cyclodextrin-oligolactide derivatives

Authors: Alena Opálková Šišková<sup>1</sup>, Liviu Sacarescu<sup>2</sup>, Andrej Opálek<sup>3</sup>, Jaroslav Mosnáček<sup>1</sup>, Cristian Peptu<sup>1,2\*</sup>

Affiliations:

<sup>1</sup> Polymer Institute of the Slovak Academy of Sciences, Dúbravská Cesta 9, 84541 Bratislava, Slovakia;

<sup>2</sup> “Petru Poni” Institute of Macromolecular Chemistry, Aleea Grigore Gica Voda 41A, 700487 Iasi, Romania

<sup>3</sup> Institute of Material and Machine Mechanics of the Slovak Academy of Sciences, Dúbravská cesta 9, 84513 Bratislava, Slovakia

\*Corresponding author – email: cristian\_peptu@yahoo.com

### Contents

**Table S1.** Electrospinning parameters of the electrospun CDLA fibers. – page S2

**Figure S1.** Representative SEM images of the electrospun CDLA nanofibrous mats obtained by application of different parameters during the electrospinning of CDLA solutions in DMF; SEM images correspond to the sample number as assigned in **Table S1** (bar represents 10 µm). – page S3

**Table S2.** Electrospinning parameters – fibers prepared using *N,N*-dimethylacetamide (DMAc). – page S4

**Figure S2.** SEM images of the ESP fibers prepared using DMAc (numbers under images are associated with the preparation conditions given in **Table S2**). – page S4

**Table S3.** Electrospinning parameters – fibers prepared using water/acetonitrile. – page S5

**Figure S3.** SEM images of the ESP fibers prepared using W/A mixture (numbers under each image are associated with the preparation conditions given in **Table S3**). – page S6

**Figure S4.** SEM images of electrospun CDLA. The electrospinning conditions are the following: a - W/A solvent, 140% w/v, 0.1 mL/h, 13 cm, 25 kV, b - W/A solvent, 130% w/v, 0.1 mL/h, 13 cm, 25 kV, c - DMF solvent, 140% w/v, 0.1 mL/h, 15 cm, 15 kV, d - DMF solvent, 130% w/v, 0.1 mL/h, 15 cm, 15 kV. – page S7

**Figure S5.** SEM images of the ESP fibers prepared using the W/A solvent, an applied voltage of 15kV, a flow rate of 0,1mL/h, and a concentration of 160% (w/v). – page S7

**Figure S6.** SEM images of the ESP fibers prepared using the DMF solvent, an applied voltage of 15kV, a flow rate of 0,1mL/h, and a concentration of 160% (w/v). – page S8

**Table S1.** Electrospinning parameters of the electrospun CDLA fibers.

| Sample # | Solution concentration (w/v) | Solvent | Voltage [kV] | Flow rate [mL/h] | NCD <sup>1</sup> [cm] | Morphology                 | Fibers diameters [nm] |
|----------|------------------------------|---------|--------------|------------------|-----------------------|----------------------------|-----------------------|
| 1        | 150%                         | DMF     | 10           | 0.5              | 13                    | Drops                      | -                     |
| 2        | 150%                         | DMF     | 15           | 0.5              | 13                    | Beads <sup>2</sup>         | 243±80                |
| 3        | 150%                         | DMF     | 20           | 0.5              | 13                    | Beaded fibers <sup>2</sup> | 238±76                |
| 4        | 150%                         | DMF     | 25           | 0.1              | 13                    | Fibers *                   | 194±93                |
| 5        | 150%                         | DMF     | 25           | 0.1              | 15                    | Beaded fibers              | 254±109               |
| 6        | 160%                         | DMF     | 15           | 0.1              | 13                    | Fibers *                   | 342±190               |
| 7        | 160%                         | DMF     | 15           | 0.1              | 15                    | Fibers *                   | 272±132               |
| 8        | 160%                         | DMF     | 15           | 0.1              | 17                    | Fibers *                   | 298±155               |
| 9        | 160%                         | DMF     | 15           | 0.2              | 13                    | Beaded fibers              | 202±91                |
| 10       | 160%                         | DMF     | 15           | 0.5              | 13                    | Beaded fibers              | 258±120               |
| 11       | 170%                         | DMF     | 15           | 0.5              | 13                    | Beads <sup>2</sup>         | 174±95                |
| 12       | 170%                         | DMF     | 25           | 0.2              | 13                    | Beaded fibers              | 200±84                |
| 13       | 170%                         | DMF     | 25           | 0.1              | 13                    | Beaded fibers              | 167±86                |
| 14       | 170%                         | DMF     | 25           | 0.1              | 15                    | Beaded fibers              | 206±123               |
| 15       | 180%                         | DMF     | 25           | 0.1              | 13                    | Fibers *                   | 302±196               |
| 16       | 180%                         | DMF     | 25           | 0.1              | 15                    | Fibers *                   | 261±162               |
| 17       | 180%                         | DMF     | 25           | 0.2              | 13                    | Beaded Fibers              | 212±148               |
| 18       | 180%                         | DMF     | 25           | 0.5              | 15                    | Beaded Fibers              | 277±144               |

Notes: <sup>1</sup> NCD–Needle-to-collector distance, \* Beads appeared rarely, <sup>2</sup> Fibers rarely, # stands for no. and can be changed.

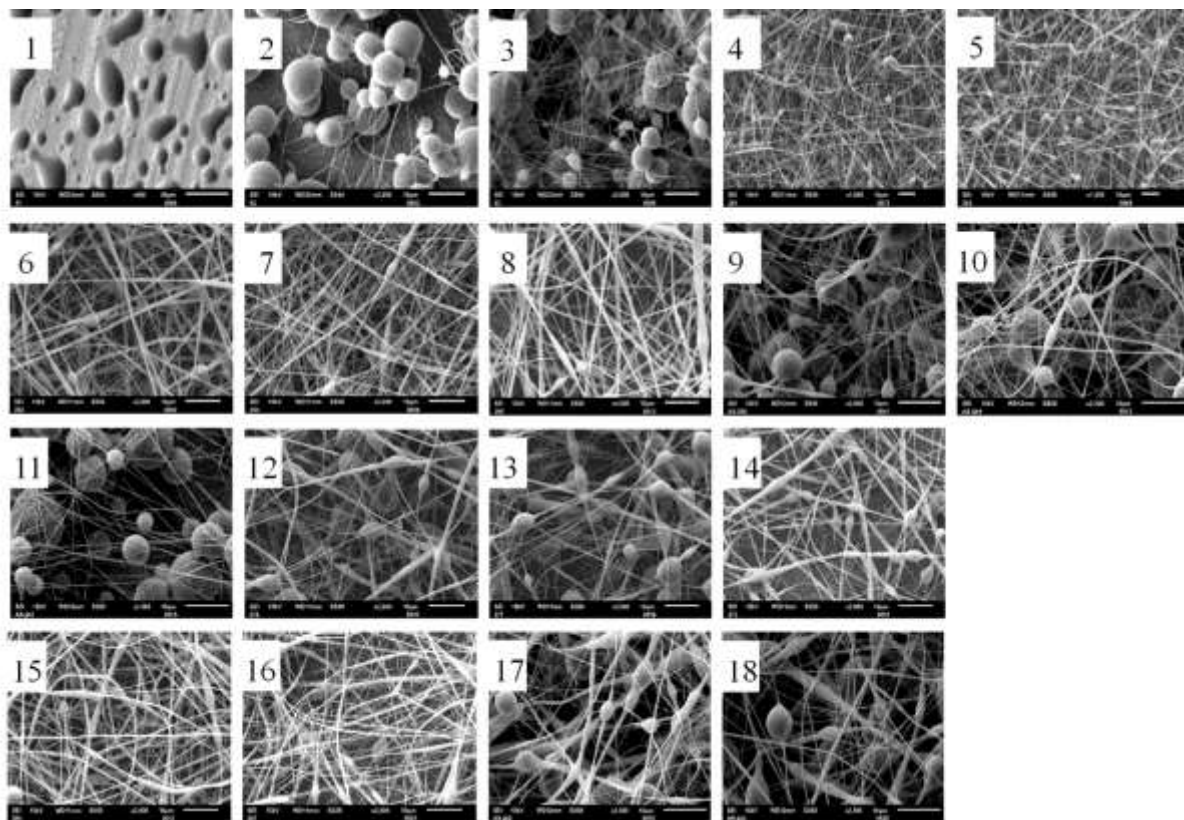

**Figure S1.** Representative SEM images of the electrospun CDLA nanofibrous mats obtained by application of different parameters during the electrospinning of CDLA solutions in DMF; numbers on the SEM images correspond to the sample numbers assigned in **Table S1** (bar represents 10  $\mu\text{m}$ ).

**Table S2.** Electrospinning parameters–fibers prepared using *N,N*-dimethylacetamide (DMAc).

| Sample<br># | Solution<br>concentration<br>(w/v) | Solvent | Voltage<br>[kV] | Flow rate<br>[mL/h] | NCD <sup>1</sup><br>[cm] | Morphology       | Fibers<br>diameters<br>[nm] |
|-------------|------------------------------------|---------|-----------------|---------------------|--------------------------|------------------|-----------------------------|
| 1           | 160%                               | DMAc    | 15              | 0.1                 | 13                       | Beaded<br>fibers | 174±58                      |
| 2           | 160%                               | DMAc    | 25              | 0.1                 | 13                       | Beaded<br>fibers | 181±84                      |

# stands for no. and can be changed.

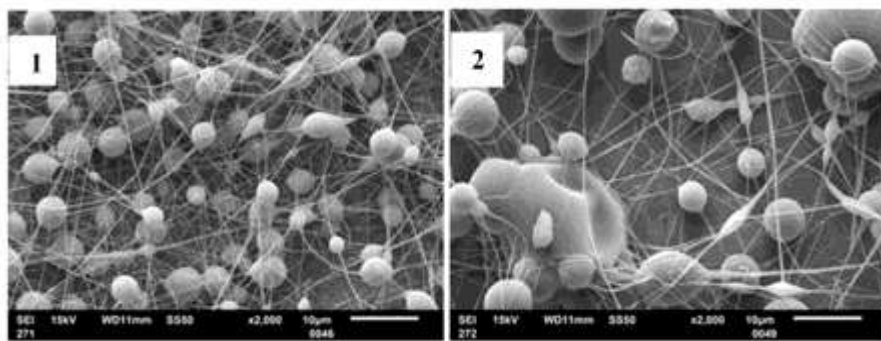

**Figure S2.** SEM images of the ESP fibers prepared using DMAc (numbers on the images are associated with the preparation conditions given in **Table S2**).

**Table S3.** Electrospinning parameters–fibers prepared using water/acetonitrile (NCD: 13 cm).

| Sample no. | Solution concentration (w/w) | Voltage [kV] | Flow rate [mL/hour] | Morphology | Fibers diameters [nm] |
|------------|------------------------------|--------------|---------------------|------------|-----------------------|
| 1          | 150                          | 10           | 0.1                 | Fibers     | 315 ± 304             |
| 2          | 150                          | 15           | 0.1                 | Fibers     | 381 ± 241             |
| 3          | 150                          | 20           | 0.1                 | Fibers     | 385 ± 288             |
| 4          | 150                          | 25           | 0.1                 | Fibers     | 317 ± 186             |
| 5          | 150                          | 10           | 0.2                 | Fibers     | 400 ± 169             |
| 6          | 150                          | 15           | 0.2                 | Fibers     | 339 ± 163             |
| 7          | 150                          | 20           | 0.2                 | Fibers     | 424 ± 238             |
| 8          | 150                          | 25           | 0.2                 | Fibers     | 357 ± 188             |
| 9          | 150                          | 10           | 0.5                 | Fibers     | 292 ± 120             |
| 10         | 150                          | 15           | 0.5                 | Fibers     | 492 ± 733             |
| 11         | 150                          | 20           | 0.5                 | Fibers     | 718 ± 495             |
| 12         | 150                          | 25           | 0.5                 | Fibers     | 494 ± 528             |
| 13         | 160                          | 10           | 0.1                 | Fibers     | 214 ± 88              |
| 14         | 160                          | 15           | 0.1                 | Fibers     | 257 ± 155             |
| 15         | 160                          | 20           | 0.1                 | Fibers     | 308 ± 222             |
| 16         | 160                          | 25           | 0.1                 | Fibers     | 417 ± 218             |
| 17         | 160                          | 10           | 0.2                 | Fibers     | 579 ± 1 454           |
| 18         | 160                          | 15           | 0.2                 | Fibers     | 491 ± 375             |
| 19         | 160                          | 20           | 0.2                 | Fibers     | 539 ± 299             |
| 20         | 160                          | 25           | 0.2                 | Fibers     | 724 ± 530             |
| 21         | 160                          | 10           | 0.5                 | Fibers     | 391 ± 447             |
| 22         | 160                          | 15           | 0.5                 | Fibers     | 430 ± 239             |
| 23         | 160                          | 20           | 0.5                 | Fibers     | 1 106 ± 813           |
| 24         | 160                          | 25           | 0.5                 | Fibers     | 706 ± 566             |
| 25         | 170                          | 10           | 0.1                 | Fibers     | 334 ± 375             |
| 26         | 170                          | 15           | 0.1                 | Fibers     | 374 ± 350             |
| 27         | 170                          | 20           | 0.1                 | Fibers     | 320 ± 136             |
| 28         | 170                          | 25           | 0.1                 | Fibers     | 306 ± 175             |
| 29         | 170                          | 10           | 0.2                 | Fibers     | 485 ± 599             |
| 30         | 170                          | 15           | 0.2                 | Fibers     | 614 ± 233             |
| 31         | 170                          | 20           | 0.2                 | Fibers     | 448 ± 303             |
| 32         | 170                          | 25           | 0.2                 | Fibers     | 539 ± 453             |
| 33         | 170                          | 10           | 0.5                 | Fibers     | 420 ± 398             |
| 34         | 170                          | 15           | 0.5                 | Fibers     | 510 ± 396             |
| 35         | 170                          | 20           | 0.5                 | Fibers     | 676 ± 512             |
| 36         | 170                          | 25           | 0.5                 | Fibers     | 677 ± 276             |
| 37         | 180                          | 10           | 0.1                 | Fibers     | 379 ± 202             |
| 38         | 180                          | 15           | 0.1                 | Fibers     | 411 ± 309             |
| 39         | 180                          | 20           | 0.1                 | Fibers     | 592 ± 567             |
| 40         | 180                          | 25           | 0.1                 | Fibers     | 717 ± 567             |
| 41         | 180                          | 10           | 0.2                 | Fibers     | 533 ± 199             |
| 42         | 180                          | 15           | 0.2                 | Fibers     | 648 ± 356             |

|    |     |    |     |        |                  |
|----|-----|----|-----|--------|------------------|
| 43 | 180 | 20 | 0.2 | Fibers | $680 \pm 500$    |
| 44 | 180 | 25 | 0.2 | Fibers | $658 \pm 326$    |
| 45 | 180 | 10 | 0.5 | Beaded | $204 \pm 117$    |
| 46 | 180 | 15 | 0.5 | Fibers | $738 \pm 756$    |
| 47 | 180 | 20 | 0.5 | Fibers | $1\,241 \pm 472$ |
| 48 | 180 | 25 | 0.5 | Fibers | $1\,645 \pm 842$ |

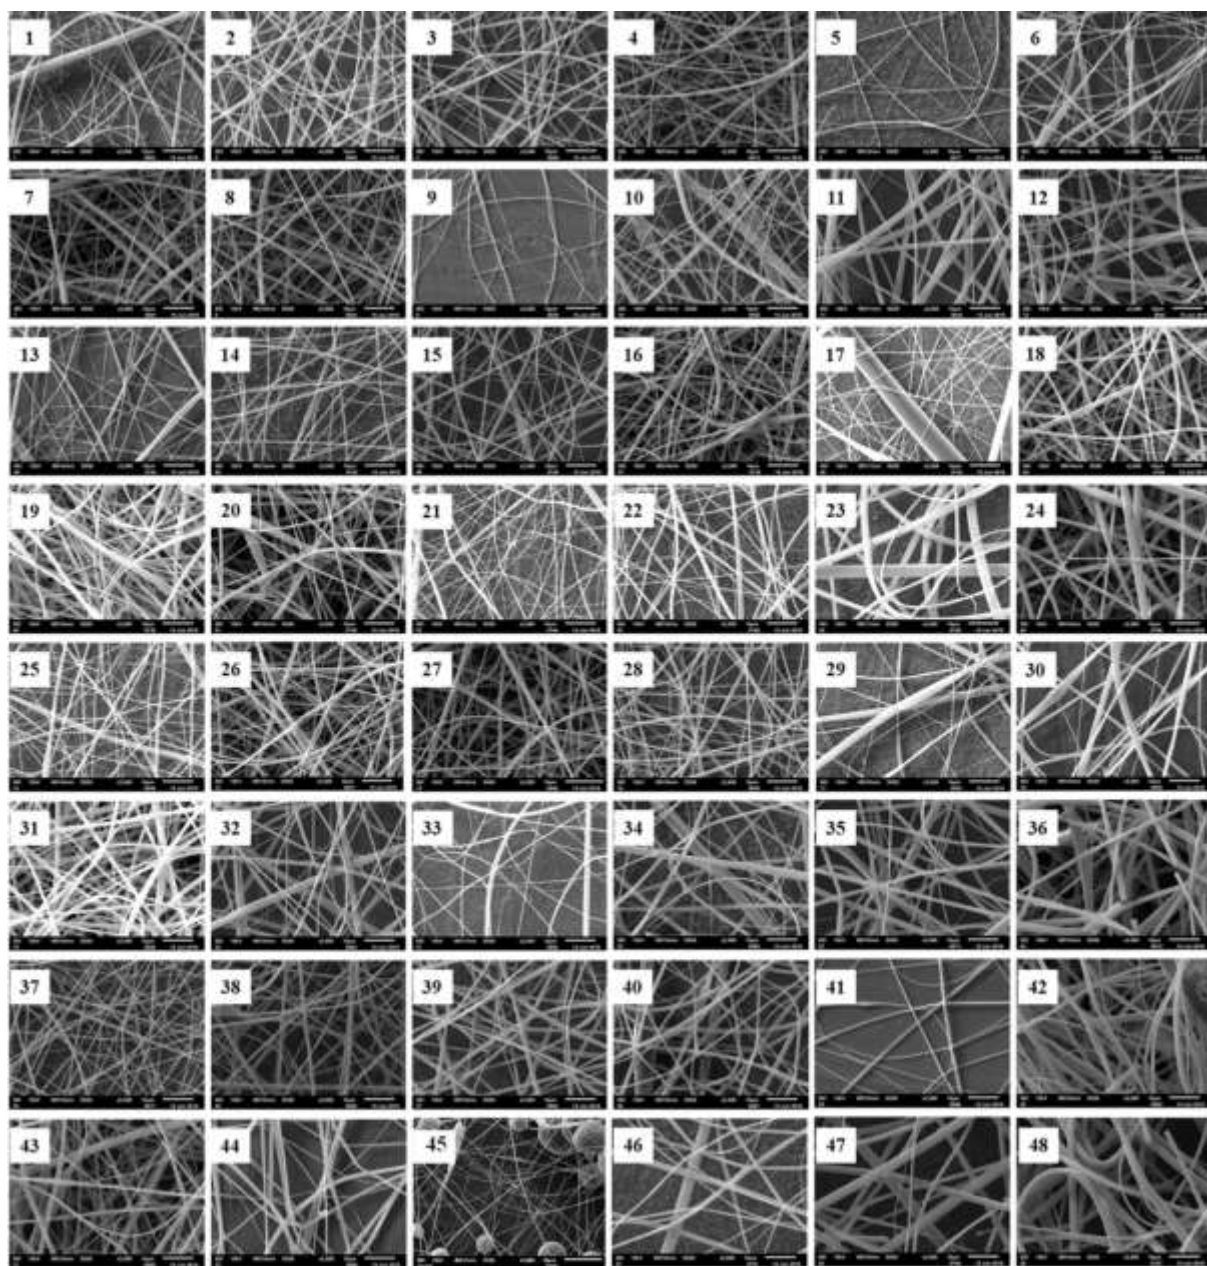

**Figure S3.** SEM images of the ESP fibers prepared using W/A mixture (numbers on each image are associated with the preparation conditions given in **Table S3**).



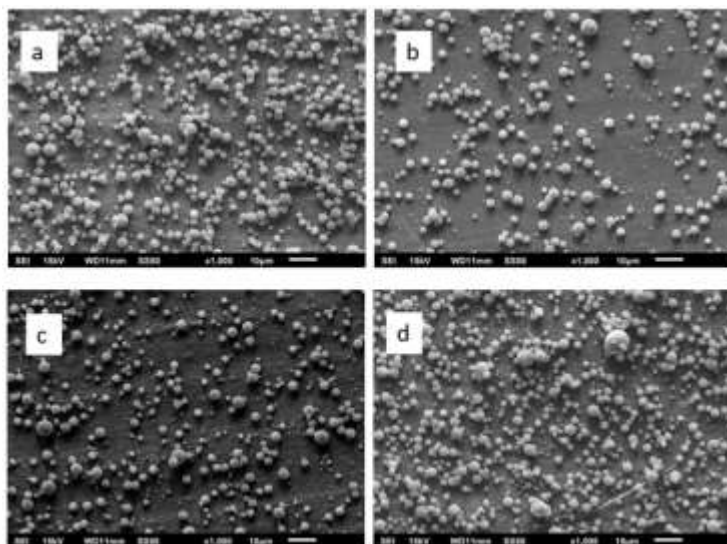

**Figure S4.** SEM images of electrospun CDLA. The electrospinning conditions are the following: a - W/A solvent, 140% w/v, 0.1 mL/h, 13 cm, 25 kV, b - W/A solvent, 130% w/v, 0.1 mL/h, 13 cm, 25 kV, c - DMF solvent, 140% w/v, 0.1 mL/h, 15 cm, 15 kV, d - DMF solvent, 130% w/v, 0.1 mL/h, 15 cm, 15 kV.

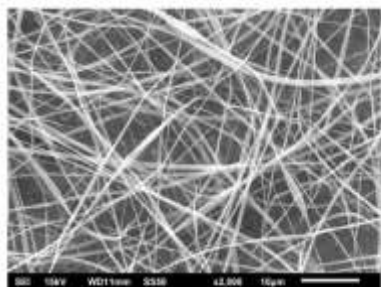

Working distance: **13 cm**

Fiber diameter:  $212 \pm 122$  nm

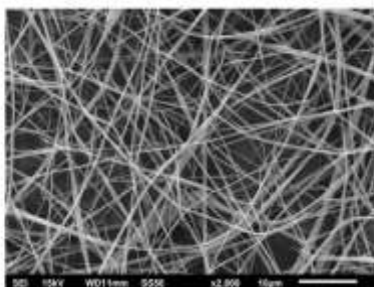

Working distance: **15 cm**

Fiber diameter:  $228 \pm 123$  nm

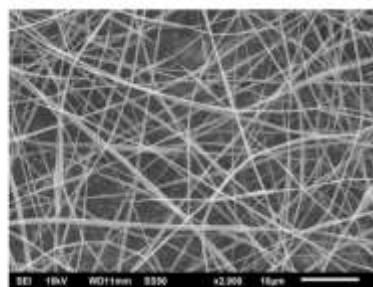

Working distance: **17 cm**

Fiber diameter:  $219 \pm 115$  nm

**Figure S5.** SEM images of the ESP fibers prepared using the W/A solvent, an applied voltage of 15kV, a flow rate of 0,1mL/h, and a concentration of 160% (w/v).

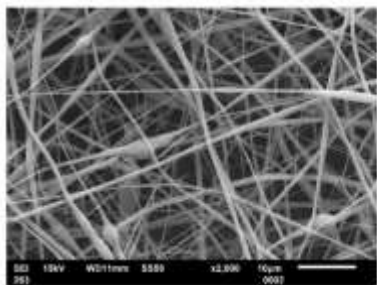

Working distance: **13 cm**

Fiber diameter:  $342 \pm 193$  nm

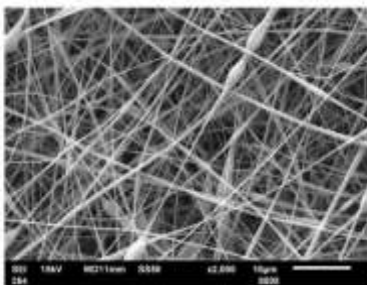

Working distance: **15 cm**

Fiber diameter:  $272 \pm 132$  nm

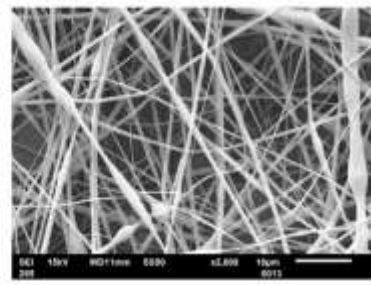

Working distance: **17 cm**

Fiber diameter:  $298 \pm 155$  nm

**Figure S6.** SEM images of the ESP fibers prepared using the DMF solvent, an applied voltage of 15kV, a flow rate of 0,1mL/h, and a concentration of 160% (w/v).
